# Supplementary material
Source: PubMed Central journal article supplement (PMC6879329)
Supplement: supp_RA119.009521_153102_2_supp_412246_pzh2k1.pdf [file supp_RA119.009521_153102_2_supp_412246_pzh2k1.pdf]

Activin A receptor type 1-mediated BMP signaling regulates RANKL-induced osteoclastogenesis via canonical SMAD signaling pathway

**Maiko Omi<sup>1</sup>, Vesa Kaartinen<sup>1</sup>, and Yuji Mishina<sup>1\*</sup>**

From the <sup>1</sup>Department of Biologic and Materials Sciences & Prosthodontics, School of Dentistry, University of Michigan, Ann Arbor, MI 48109, USA

Running title: *ACVRI required for osteoclastogenesis*

\*To whom correspondence should be addressed: Yuji Mishina: Department of Biologic and Materials Sciences & Prosthodontics, School of Dentistry, University of Michigan, Ann Arbor, MI 48109, USA; 4222A Dental, 1011 N. University Ave, Ann Arbor, MI 48109-1078; Tel: (734)763-5579; Fax: (734)647-2110; E-mail: [mishina@umich.edu](mailto:mishina@umich.edu).

## Supporting information

### Experimental procedures

#### **Genomic real-time PCR**

Genomic quantitative PCR was performed using TaqMan Gene Expression Assays. The following custom designed primer sets to detect *Acvr1* exon 7 (AIKAL5S\_F 5'-CTCACTACTCTGGATACGGTTAGCT-3', AIKAL5S\_R 5'-GGGTCCCAAATATCTCTATGTGCAA-3', AIKAL5S\_M FAM 5'-CTATGGACAGTACAATCCG-3') and *Egfp* (5'-GAGCGCACCATCTTCTTCAAG-3', 5'-TGTCGCCCTCGAACTTAC-3', FAM 5'-ACGACGGCAACTACA-3') were purchased from Taqman (Applied Biosystems, Foster City, CA). Data were normalized to *Gapdh* by the 2- $\Delta\Delta$ ct method.

#### **X-gal staining**

Cells were fixed in 4% paraformaldehyde (PFA) for 10 min on ice and then stained with X-gal solution (containing 1 mg/ml X-gal, 5 mM potassium hexacyanoferrate, 5 mM potassium hexacyanoferrate, 0.1% sodium deoxycholate, 2% NP-40, 2 mM MgCl<sub>2</sub> in 0.1 M sodium phosphate buffer) at 37 °C overnight.

#### **Gene silencing**

siRNAs for negative control (scrambled, #4390843), targeting *Smad1* (#4390771, siRNAID s69488), *Smad5* (#4390771, siRNAID s69502) and *Smad4* (#4390771, siRNAID s201660) were from Thermofisher. Transfection procedure was performed according to Lipofectamine RNAiMAX reagent (Invitrogen) protocol. Final siRNA amount was 25pmol for each 6-well dish. After incubation for 24 hours, cells were treated with M-CSF/RANKL to induce osteoclast differentiation.

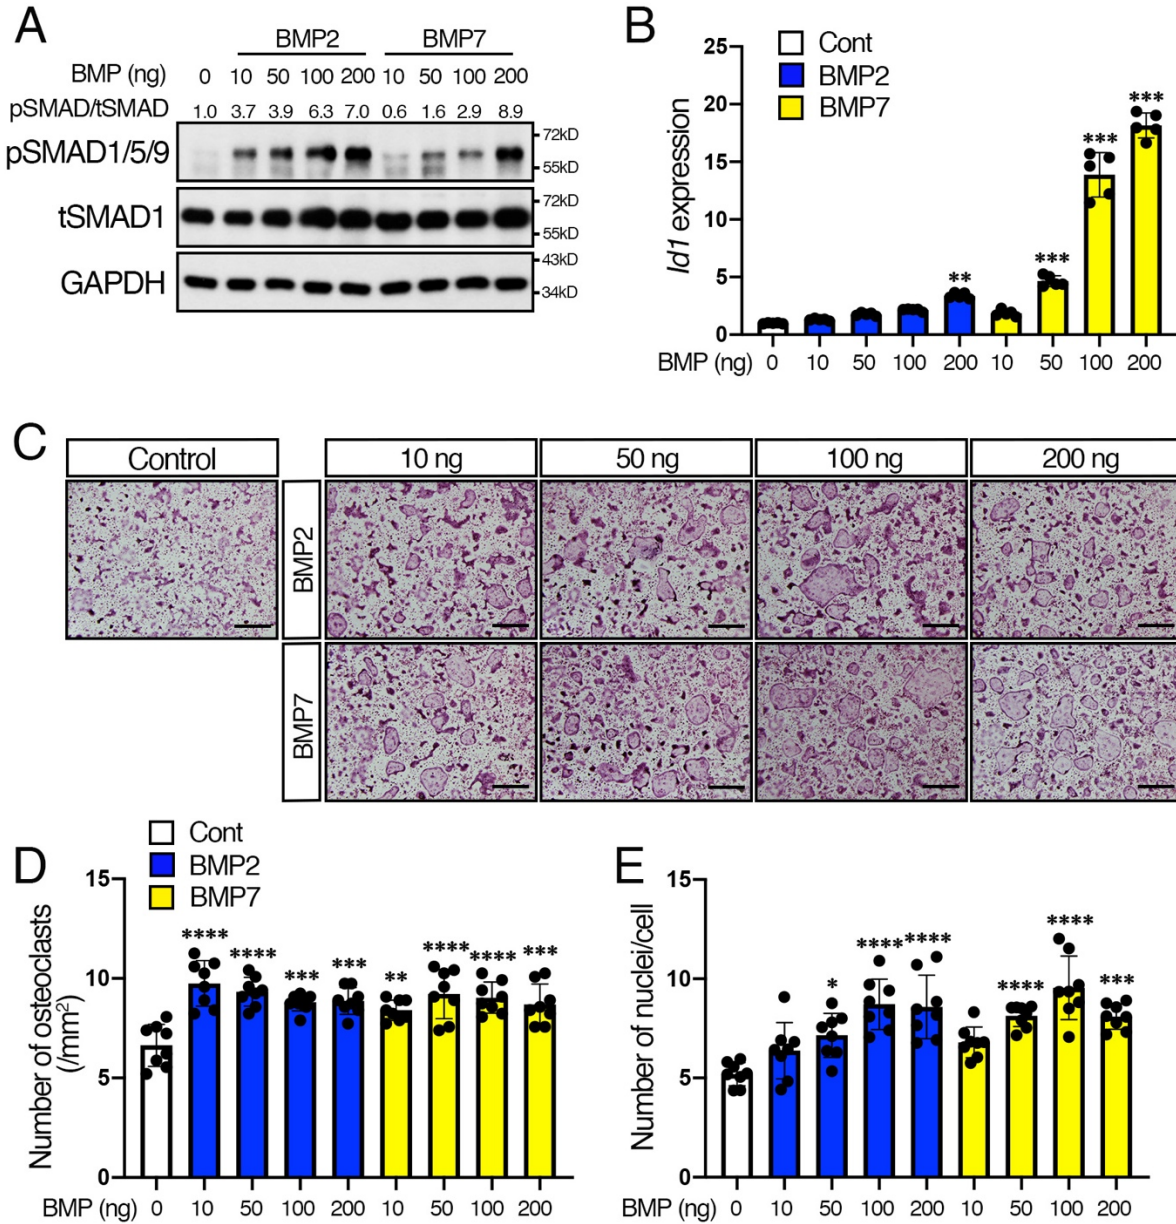

**Figure S1.** BMP-2 and BMP-7 enhanced RANKL-induced osteoclastogenesis. (A) Bone marrow mononuclear cells (BMMs) from control mice were cultured in the presence of M-CSF (20 ng/ml) and RANKL (50 ng/ml) for 2 days. Differentiated osteoclasts were stimulated with BMP-2 and BMP-7 for 30 minutes, and protein lysates were harvested. The activation of SMAD1/5/9 signaling in osteoclasts was examined by western blot. Fold increases of protein levels are relative to unstimulated control cells. Representative images of protein bands are shown, n = 3. (B) Differentiated osteoclasts were stimulated with BMP-2 and BMP-7 for 6 hours. Total RNA was extracted from osteoclasts, and the expression levels of *Id1* were assessed by quantitative reverse-transcribed PCR (qRT-PCR). n = 5. (C) BMMs were seeded in 48-well plates ( $1.5 \times 10^4$  cells/well) in the presence of M-CSF (20 ng/ml) and RANKL (50 ng/ml). Cells were stained with TRAP at day 5. BMP-2 and BMP-7 were added every other day. Scale bars: 500  $\mu$ m. (D) TRAP-positive cells containing 3 or more nuclei were counted as osteoclasts. n = 8. (E) The number of nuclei per cell was analyzed. n = 8. The value of each group was compared to the non-

treatment group. Values represent the mean  $\pm$  SD. Differences were assessed by one-way ANOVA, followed by a Turkey test. \* $p$ <0.05, \*\* $p$ <0.01, \*\*\* $p$ <0.001, \*\*\*\* $p$ <0.0001.

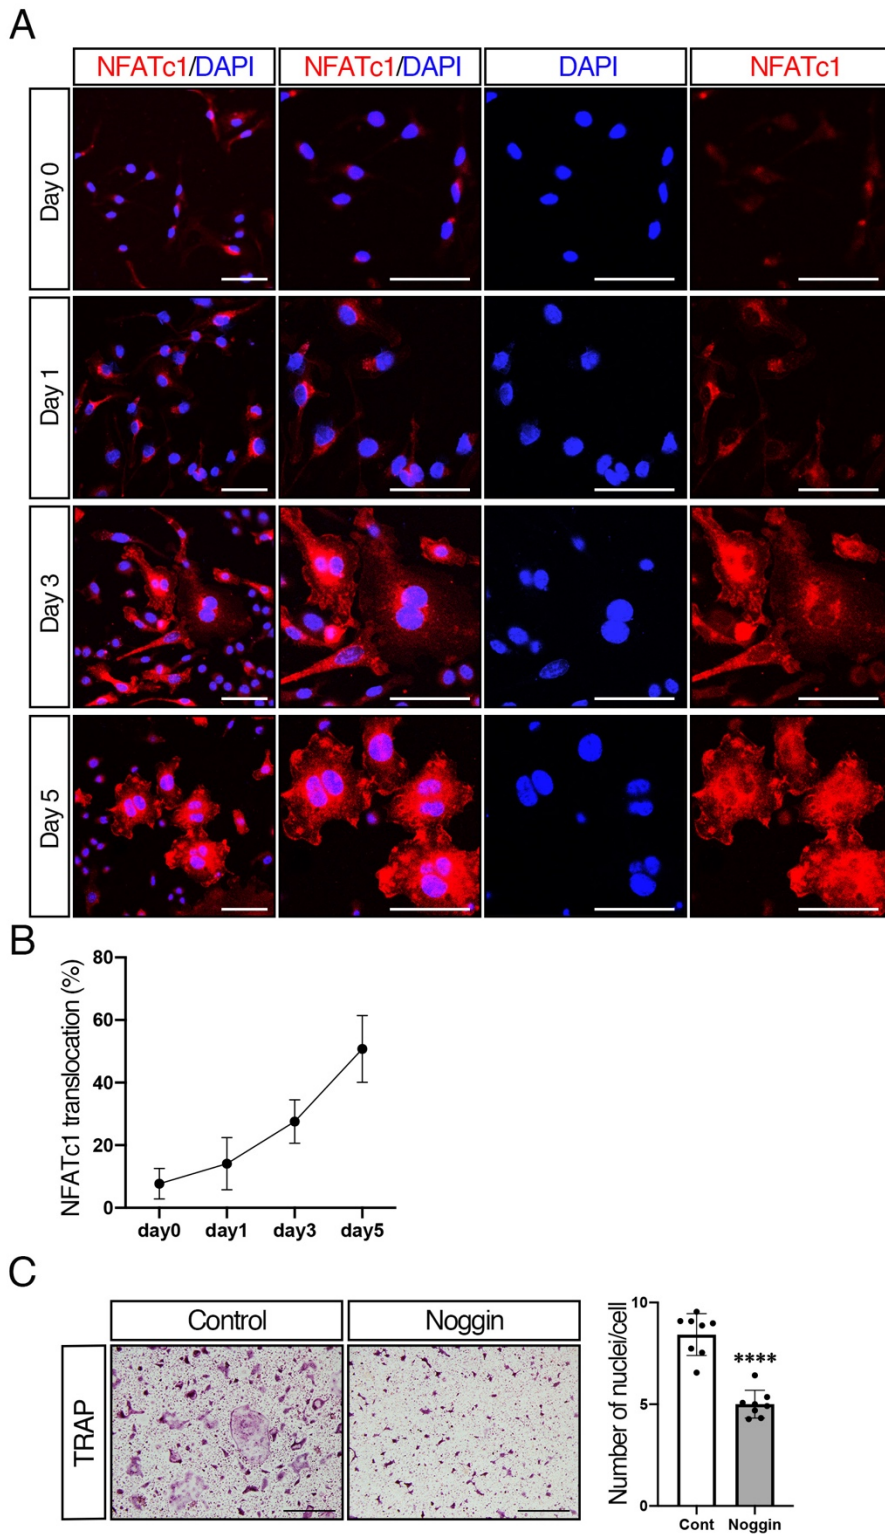

**Figure S2.** NFATc1 nuclear translocation was increased during osteoclastogenesis. (A) BMMs from control mice were incubated with M-CSF at 20 ng/mL (Day 0). M-CSF (20 ng/mL) and RANKL (50 ng/mL) were added every 48 hours up to 5 days. NFATc1 nuclear localization was assessed by immunofluorescence

(red), and nuclei (blue) were stained with DAPI. Low- and high-magnification images were shown. Scale bars: 50  $\mu\text{m}$ . (B) NFATc1 nuclear translocation was expressed as a percentage of the total number of osteoclasts. Cells were rated positive for nuclear localization of NFATc1 if the fluorescence intensity of the nuclei exceeded that of the cytoplasm.  $n = 4$ . (C) BMMs from control mice were cultured in 48-well plates ( $1.5 \times 10^4$  cells/well) with M-CSF (20 ng/mL) and RANKL (100 ng/mL) for 5 days, and TRAP staining was conducted. Cells were treated with Noggin (250 ng/mL) every other day. The number of nuclei per cell was analyzed.  $n = 8$ , Scale bars: 500  $\mu\text{m}$ . Values represent the mean  $\pm$  SD. Differences were assessed by Student's *t*-test. \*\*\*\* $p < 0.0001$ .

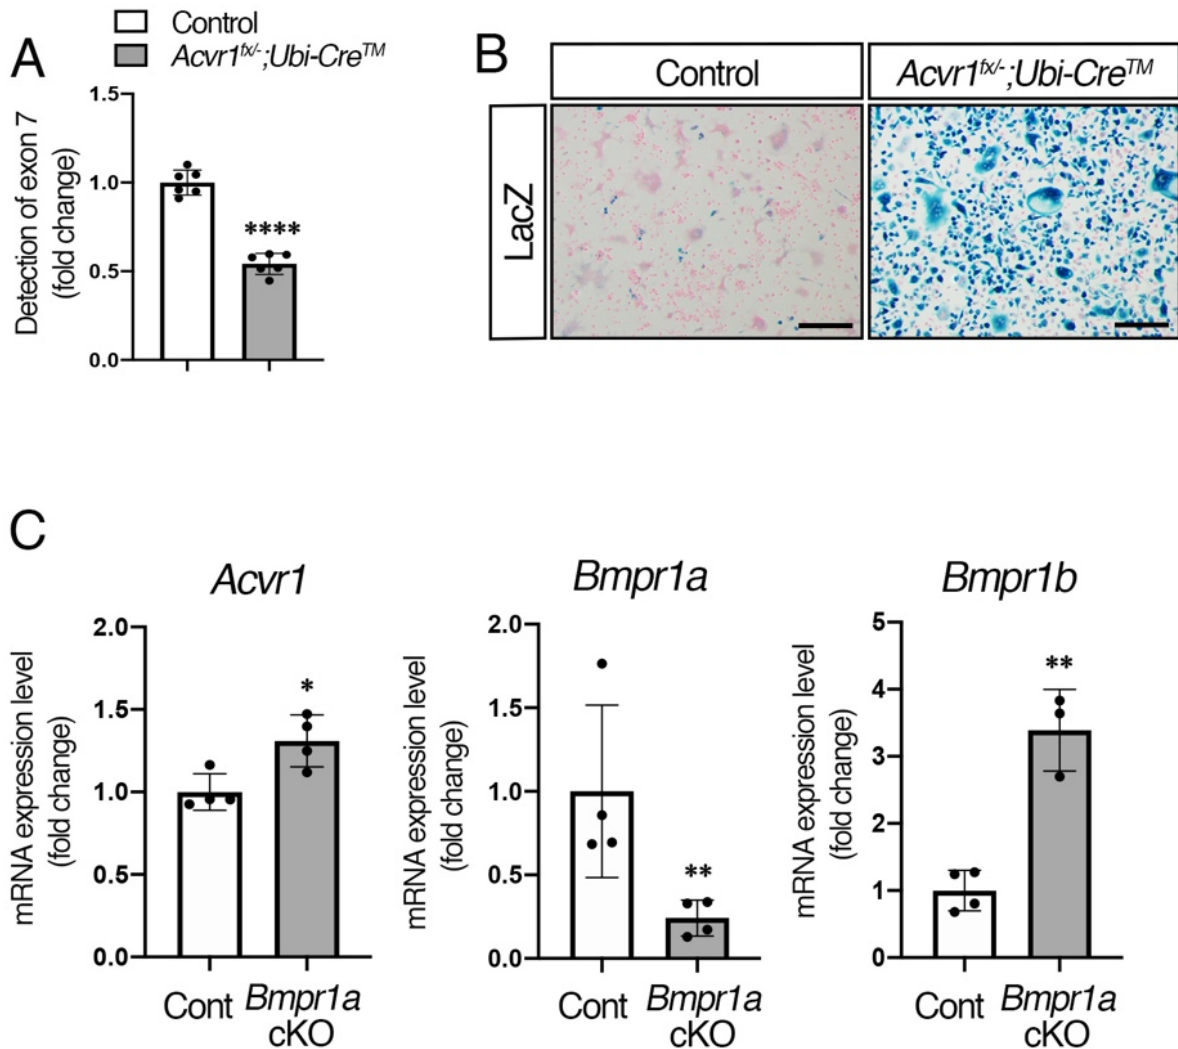

**Figure S3.** *Acvr1*-floxed alleles were deleted in *Acvr1* cKO osteoclasts. (A) BMMs from control and *Acvr1* cKO (*Acvr1<sup>lox/-</sup>;Ubi-Cre<sup>TM</sup>*) mice were incubated with M-CSF (20 ng/mL) and RANKL (100 ng/mL) for 5 days. Cre activity was induced by 4-hydroxytamoxifen (100 ng/mL) in culture. Deletion of *Acvr1* exon 7 was measured by genomic qPCR. n = 6. (B) Differentiated osteoclasts were stained with X-gal at day 5. n = 4, Scale bars: 50  $\mu$ m. (C) BMMs from control (*Bmpr1a<sup>lox/+</sup>;Ubi-Cre<sup>TM</sup>*) and *Bmpr1a* cKO (*Bmpr1a<sup>lox/-</sup>;Ubi-Cre<sup>TM</sup>*) mice were incubated with M-CSF (20 ng/mL) and RANKL (100 ng/mL) for 5 days. Cre activity was induced by 4-hydroxytamoxifen (100 ng/mL) in culture. Comparison of expression levels of *Acvr1*, *Bmpr1a*, and *Bmpr1b* between control and *Bmpr1a* cKO osteoclasts were assessed by qRT-PCR. n = 4. Values represent the mean  $\pm$  SD. Differences were assessed by Student's *t*-test. \**p*<0.05, \*\**p*<0.01, \*\*\*\**p*<0.0001.



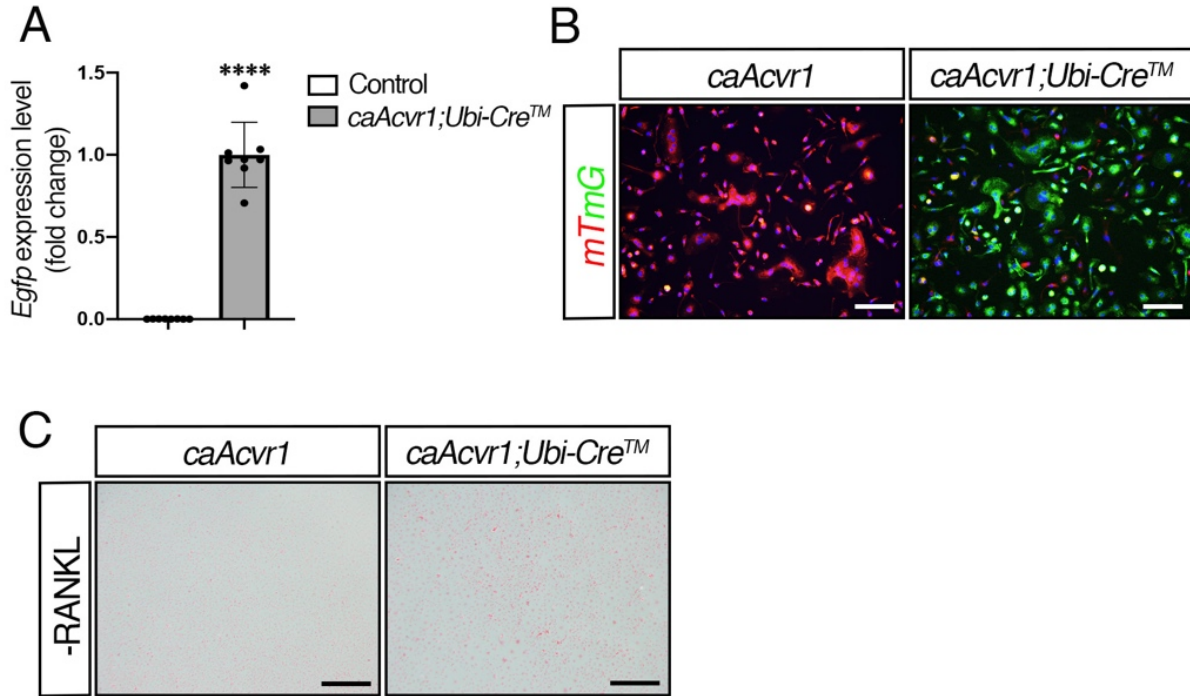

**Figure S4.** *caAcvr1*-mutant cells did not differentiate into osteoclasts without RANKL. (A) Genomic DNA was isolated from control and *caAcvr1*-mutant (*caAcvr1;Ubi-Cre<sup>TM</sup>*) osteoclasts. Expression levels of *Egfp* were quantified by quantitative real-time PCR as a surrogate of *caAcvr1*.  $n = 8$ . (B) BMMs from control (*caAcvr1*) and *caAcvr1*-mutant (*caAcvr1;Ubi-Cre<sup>TM</sup>*) mice were seeded in 48-well plates ( $1.5 \times 10^4$  cells/well) in the presence of M-CSF (20 ng/mL) and RANKL (50 ng/mL), and Cre activity was induced by 4-hydroxytamoxifen (100 ng/ml) at the same time. Cre activity in osteoclasts was monitored by mTmG expression at day 5 of RANKL treatment.  $n = 4$ , Scale bars: 200  $\mu\text{m}$ . (C) BMMs from control (*caAcvr1*) and *caAcvr1*-mutant (*caAcvr1;Ubi-Cre<sup>TM</sup>*) were cultured without RANKL for 5 days, and Cre activity was induced by 4-hydroxytamoxifen (100 ng/mL) at the same time. Cells were stained with TRAP and Nuclear Fast Red.  $n = 4$ , Scale bars: 500  $\mu\text{m}$ . Values represent the mean  $\pm$  SD. Differences were assessed by Student's *t*-test. \*\*\*\* $p < 0.0001$ .

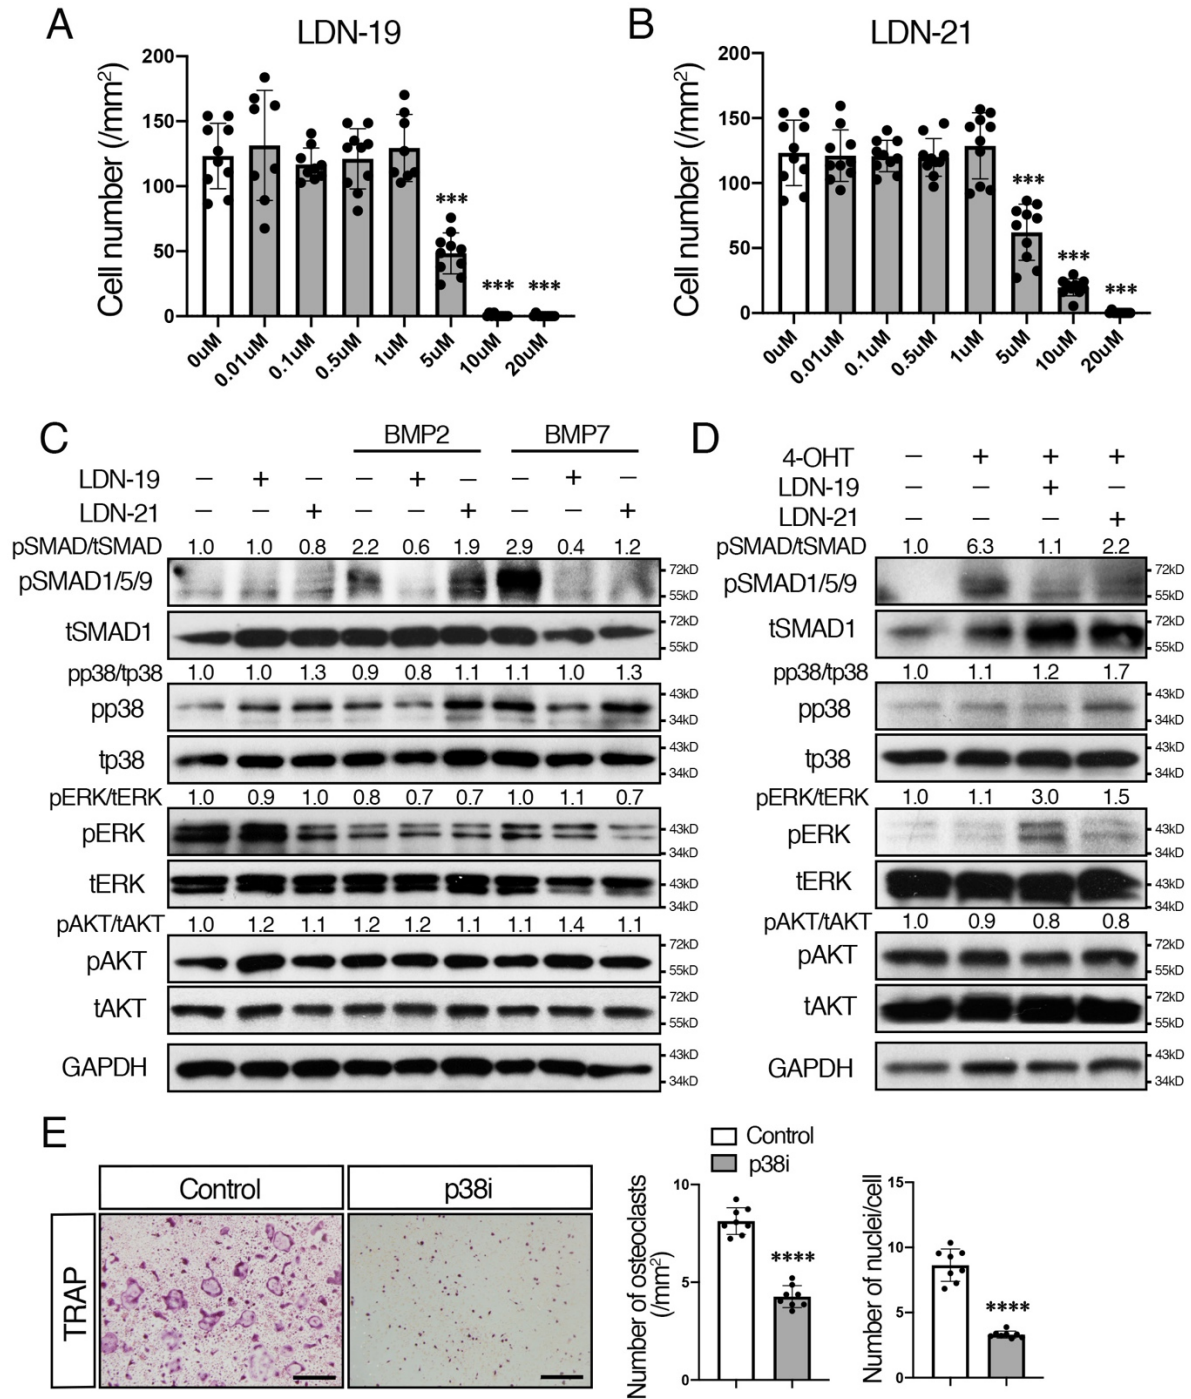

**Figure S5.** LDN-19 and LDN-21 decreased pSMAD1/5/9 levels but did not alter non-SMAD signaling pathways. (A, B) BMMs from control mice were treated with LDN-19 (LDN-193189) (A) and LDN-21 (LDN-212854) (B) for 24 hours. Cells were stained with DAPI and cell number was quantified. The value of each group was compared to the non-treatment group. n = 10. (C) BMMs from control mice were pre-treated with LDN-19 (1 μM) and LDN-21 (1 μM) for 2 hours, and cells were stimulated with BMP-2 (100 ng/mL) or BMP-7 (100 ng/mL) for 30 minutes. Control cells were treated with DMSO at a final concentration of 0.1%. Total and phosphorylated forms of SMAD1/5/9, p38, ERK, and AKT were measured by western blot. n = 3. (D) BMMs from control (*caAcvr1*) and *caAcvr1*-mutant (*caAcvr1*; *Ubi-*



*Cre<sup>TM</sup>* mice were incubated with LDN-19 and LDN-21 for 2 days, and Cre activity was induced by 4-hydroxytamoxifen (4-OHT, 100 ng/mL) at the same time. Fold increases of protein levels are relative to unstimulated control cells. Representative images of protein bands are shown, n = 3. (E) BMMs from control mice were seeded in 48-well plates ( $1.5 \times 10^4$  cells/well) with M-CSF (20 ng/mL) and RANKL (100 ng/mL) for 5 days and TRAP staining was conducted. Cells were treated with p38 MAPK inhibitor (SB203580, 1 $\mu$ M). Control cells were treated with DMSO at a final concentration of 0.1%. n = 8, Scale bars: 500  $\mu$ m. Values represent the mean  $\pm$  SD. Differences were assessed by one-way ANOVA, followed by a Turkey test. \*\*\* $p < 0.001$ .

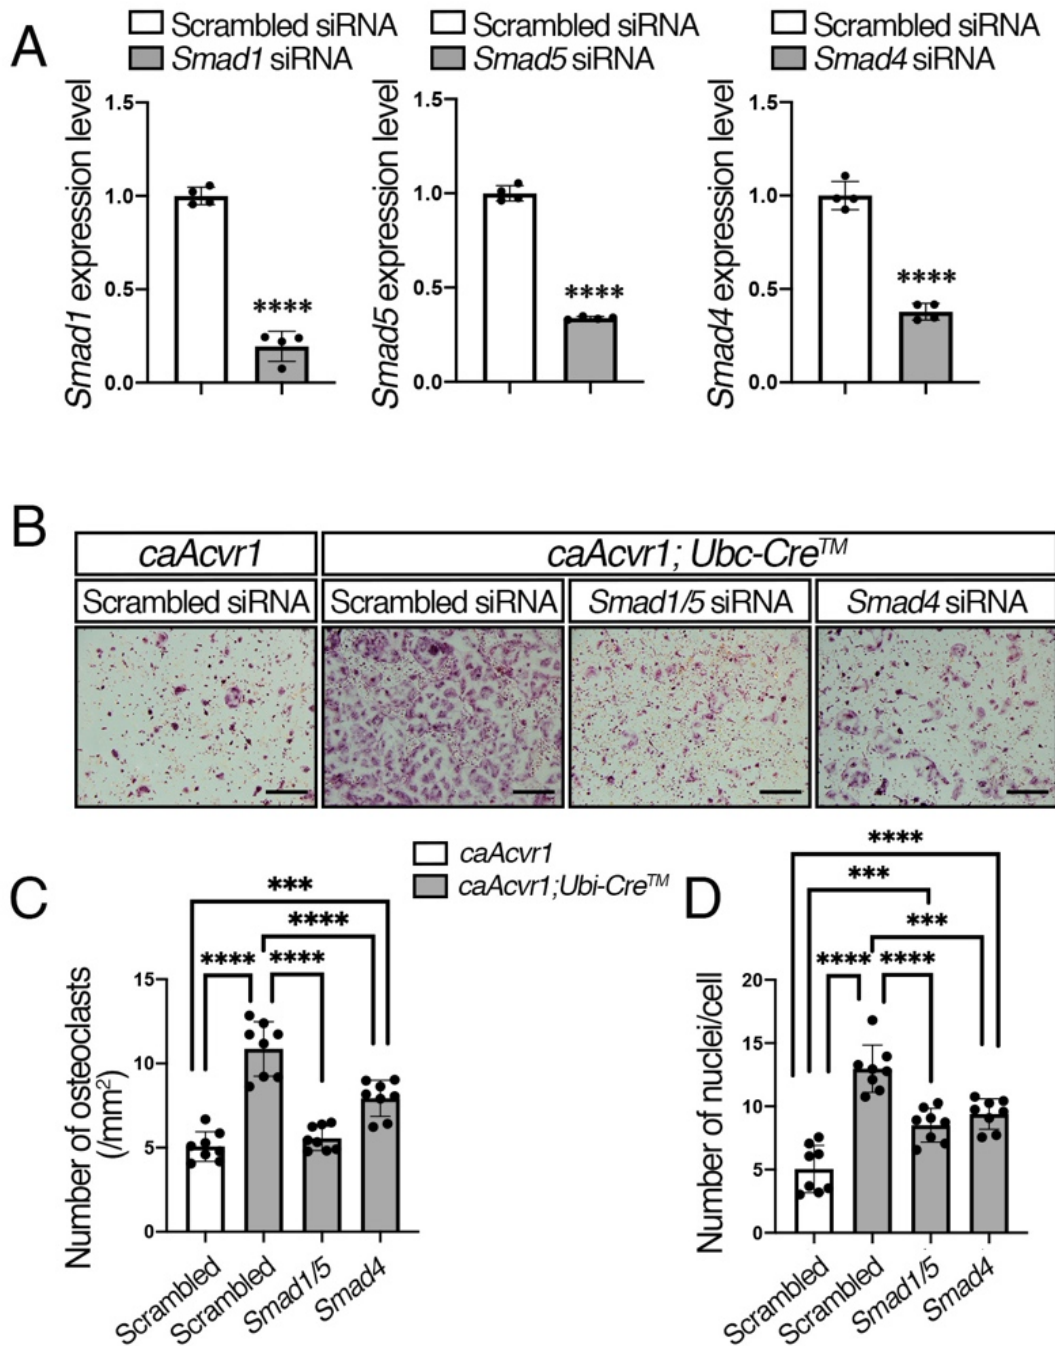

**Figure S6.** *Smad1/5* and *Smad4* gene silencing reduced osteoclast differentiation of *caAcvr1*-mutant cells. (A) BMMs from control mice were transfected with siRNAs against *Smad1*, *Smad5* and *Smad4* for 24 hours. Total RNAs were extracted and gene expression levels were measured by qRT-PCR. n = 4. (B) BMMs from control (*caAcvr1*) and *caAcvr1*-mutant (*caAcvr1; Ubi-Cre<sup>TM</sup>*) mice were transfected with siRNAs against *Smad1*, *Smad5* and *Smad4*, and seeded in 48-well plates ( $1.5 \times 10^4$  cells/well) with M-CSF (20 ng/mL), RANKL (100 ng/mL) and 4-hydroxytamoxifen (100 ng/mL) for 5 days and TRAP staining was conducted. Scale bars: 500  $\mu$ m. (C) TRAP-positive cells containing 3 or more nuclei were counted as osteoclasts. n = 8. (D) The number of nuclei per cell was analyzed. n = 8. Values represent the

mean  $\pm$  SD. Differences were assessed by one-way ANOVA, followed by a Turkey test, \* $p$ <0.05, \*\*\* $p$ <0.001, \*\*\*\* $p$ <0.0001.

Figure 2B

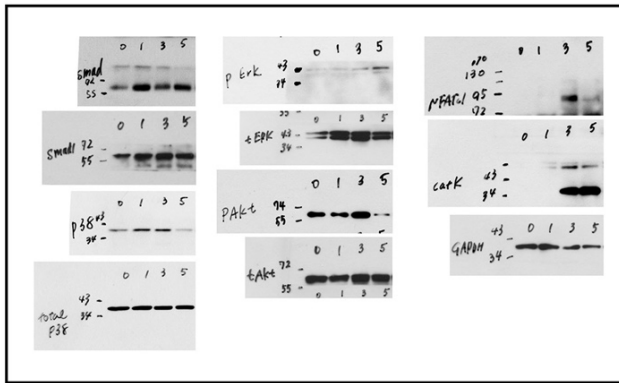

Figure 2C

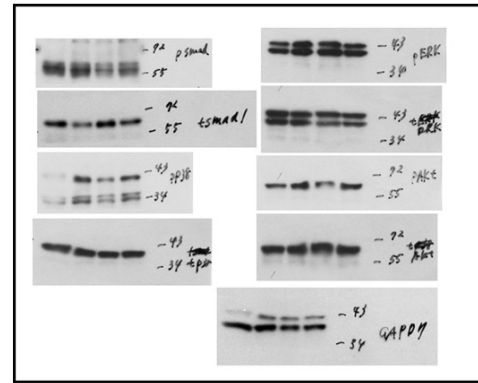

Figure 4A

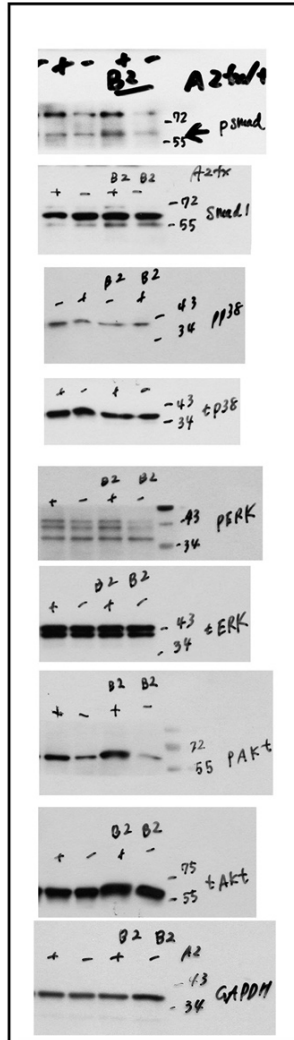

Figure 4B

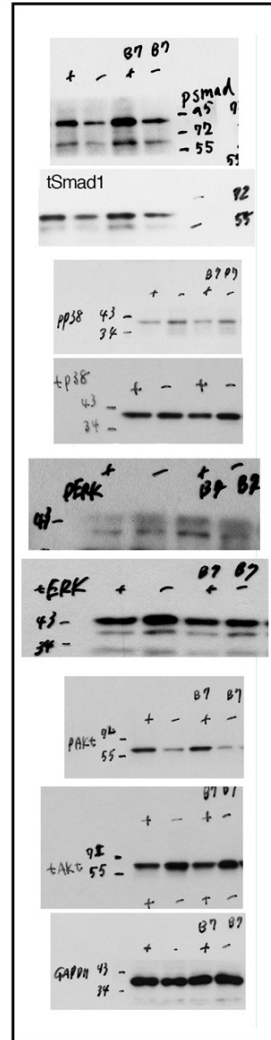

Figure 4C

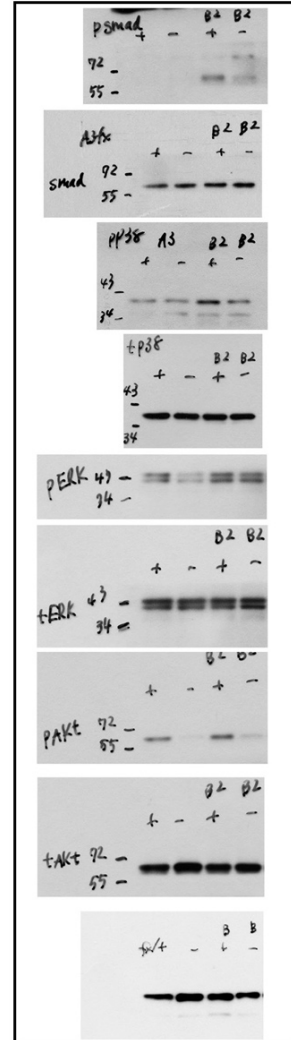

Figure 4D

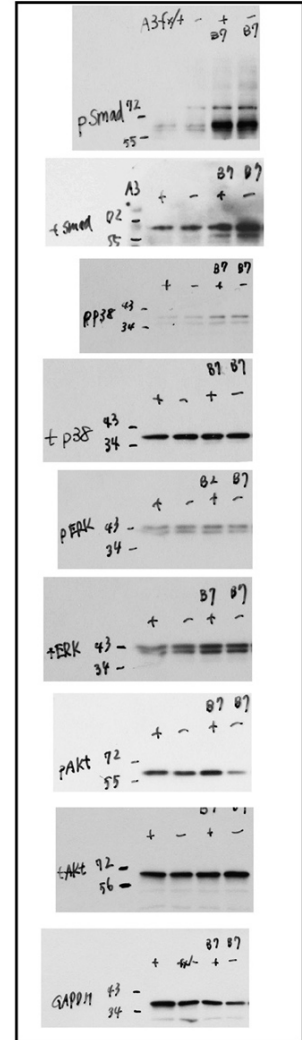

Figure 5H

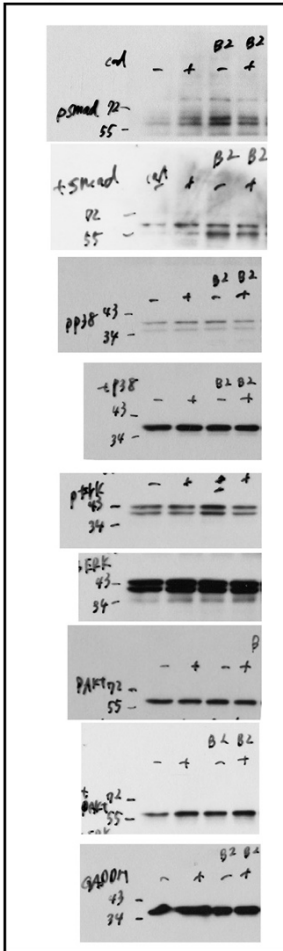

Figure 5I

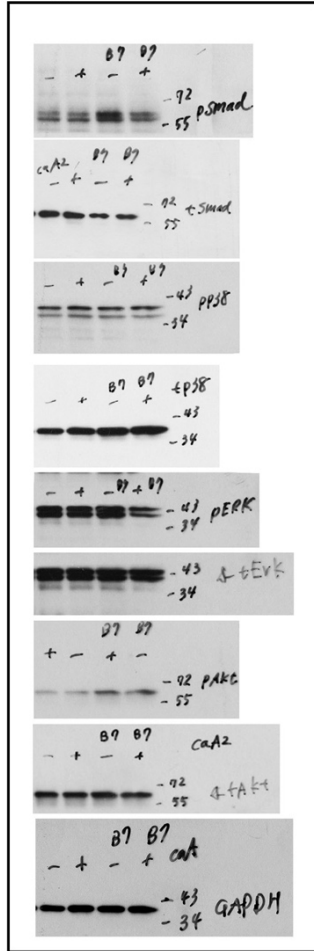

Figure 7A

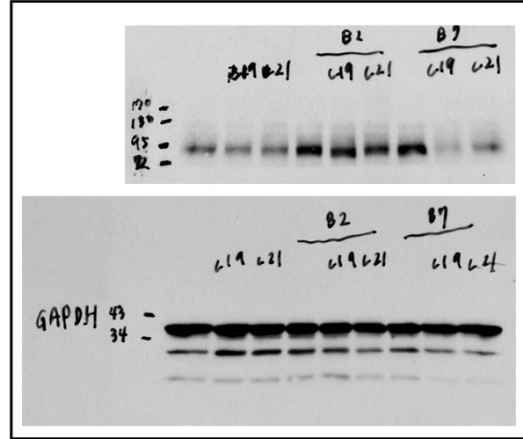

Figure 7B

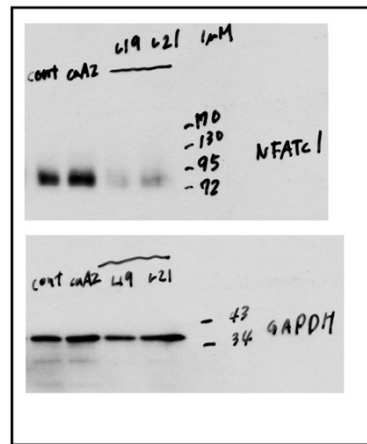

Figure 8D

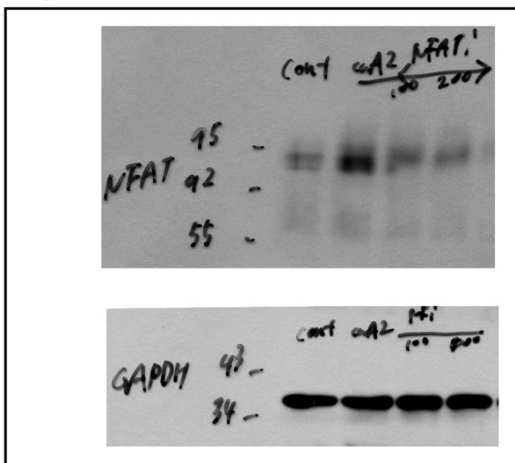

**Figure S7.** The uncropped films of western blot results shown in Fig. 2, Fig. 4, Fig. 5, Fig. 7 and Fig. 8. For all the experiments detections of SMAD1/5/9 and AKT, and ERK and p38 were performed on different membranes, due to the similar molecular weight. The samples were derived from the same experiment.
